# Supplementary material
Source: PubMed Central journal article supplement (PMC3127612)
Supplement: supp_77_11_3870__2.pdf [file supp_77_11_3870__2.pdf]

## Supplemental Figure 2

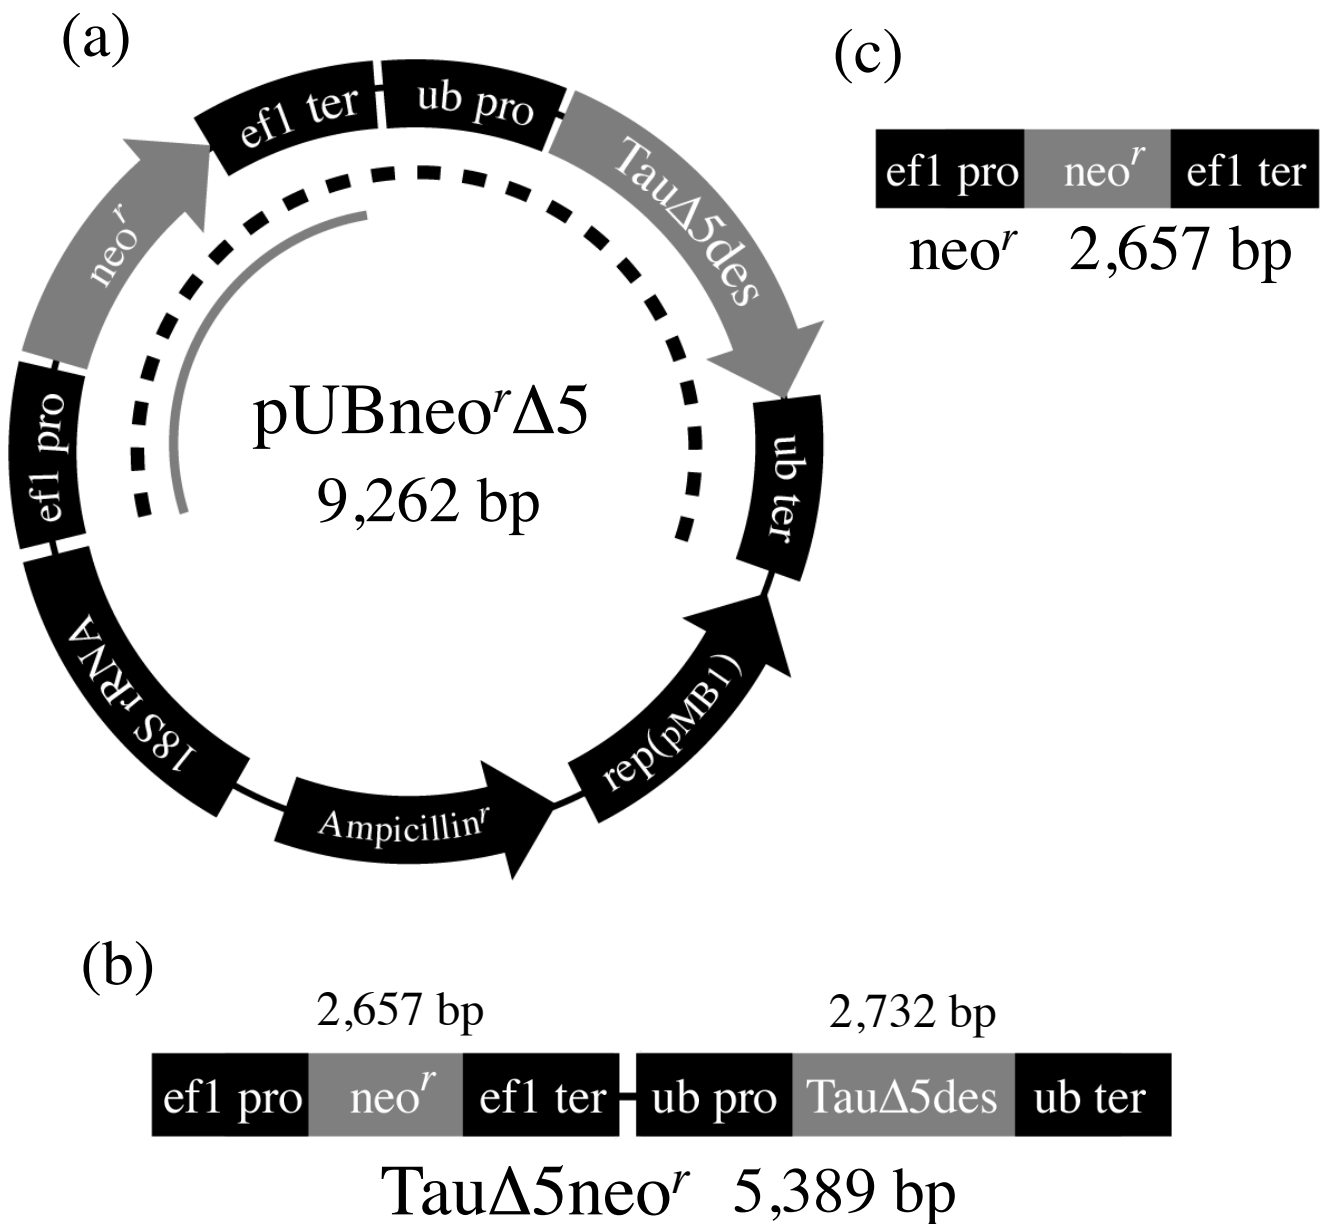

**Figure 2. Construction of (a) the plasmid vector, and linear DNA cassettes for the expression of (b) the TauD5des and neo<sup>r</sup> genes, and (c) the neo<sup>r</sup> gene in thraustochytrids.**

(a), The plasmid vector (pUBneo<sup>r</sup>D5), generated using the plasmid vector pUC18 as a basic frame, consists of a TauD5des gene driven by the ubiquitin promoter/terminator, a neo<sup>r</sup> gene driven by the EF1a promoter/terminator, a 18S rRNA gene, and an ampicillin-resistance gene (ampicillin<sup>r</sup>). Broken and solid lines indicate the region of the linear DNA fragment amplified in (b) and (c), respectively. (b), The linear DNA cassette for the expression of the TauD5des and neo<sup>r</sup> genes consists of a TauD5des gene driven by the ubiquitin promoter/terminator and a neo<sup>r</sup> gene driven with EF1a promoter/terminator. (c), The linear DNA cassette for the expression of the neo<sup>r</sup> gene consists of a neo<sup>r</sup> gene driven by the EF1a promoter/terminator. The cassettes described in (b) and (c) were used to transform *A. limacinum* mh0186, generating TauD5des-harboring transformants (mhD5neo<sup>r</sup>) and mock transformants (mhneo<sup>r</sup>), respectively.
